# Supplementary material
Source: HighWire-hosted journal article supplement (https://www.ez-admanager.com/content/suppl/2018/06/28/WNL.0000000000004667)
Supplement: weston_2167.pdf [file weston_2167.pdf]

# Neurofilamento liviano sérico en la enfermedad de Alzheimer familiar

## Un marcador de neurodegeneración temprana

ABIERTO

Philip S.J. Weston, MRCP  
Teresa Poole, MSc  
Natalie S. Ryan, MRCP  
Akshay Nair, MRCPsych  
Yuying Liang, MRCP  
Kirsty Macpherson, BA  
Ronald Druyeh, BSc  
Ian B. Malone, PhD  
R. Laila Ahsan, MSc  
Hugh Pemberton, MSc  
Jana Klimova, MSc  
Simon Mead, PhD  
Kaj Blennow, MD  
Martin N. Rossor, MD  
Jonathan M. Schott, MD  
Henrik Zetterberg, MD\*  
Nick C. Fox, MD\*

Correspondencia y solicitud de separatas al Dr. Fox: n.fox@ucl.ac.uk

### RESUMEN

**Objetivos:** Investigar si la concentración sérica de neurofilamento liviano (NfL) está aumentada en la enfermedad de Alzheimer familiar (EAF), tanto antes como después del inicio de los síntomas, y si está asociada con marcadores de estadio y severidad de la enfermedad.

**Métodos:** Reclutamos 48 individuos de familias con mutaciones *PSEN1* o *APP* en un estudio de corte transversal: 18 tenían enfermedad de Alzheimer (EA) sintomática y 30 eran asintomáticos, pero con un 50% de riesgo de portar la mutación. El NfL sérico fue medido utilizando un inmunoensayo ultrasensible en matriz de molécula única (Simoa). Se realizaron estudios cognitivos y de RM; 33 participantes tuvieron varias RM, permitiendo calcular tasas de atrofia. Las pruebas genéticas establecieron el estado de la mutación. Se utilizó un modelo de regresión de mínimos cuadrados generalizado para comparar el NfL sérico entre los portadores sintomáticos de la mutación, portadores presintomáticos y no portadores, ajustándolo para edad y sexo. Los coeficientes de Spearman evaluaron las asociaciones entre el NfL sérico y (1) años estimados hacia/desde el inicio de los síntomas (AEI), (2) medidas cognitivas y (3) medidas de atrofia en RM.

**Resultados:** Diecinueve de los participantes asintomáticos eran portadores de la mutación (media AEI -9,6); 11 no eran portadores. En comparación con los no portadores, la concentración sérica fue mayor tanto en los portadores sintomáticos ( $p < 0,0001$ ) como en los presintomáticos ( $p = 0,007$ ). En todos los portadores de la mutación el NfL sérico se correlacionó con los AEI ( $\rho = 0,81$ ,  $p < 0,0001$ ) y múltiples medidas cognitivas y de imagen, incluyendo el Mini Examen del Estado Mental ( $\rho = -0,62$ ,  $p = 0,0001$ ), suma de casillas de la Clasificación Clínica de la Demencia ( $\rho = 0,79$ ,  $p < 0,0001$ ), volumen cerebral basal ( $\rho = -0,62$ ,  $p = 0,0002$ ) y tasa de atrofia cerebral total ( $\rho = 0,53$ ,  $p = 0,01$ ).

**Conclusiones:** La concentración sérica de NfL está aumentada en la EAF previo al inicio de los síntomas, y se correlaciona con las medidas de estadio y severidad de la enfermedad. El NfL sérico, por lo tanto, puede ser un marcador posible de la neurodegeneración temprana en la EA. *Neurology*® 2017;89:2167-2175

### GLOSARIO

**AEI** = años estimados al inicio de los síntomas; **CC** = control de calidad; **CDR** = *Clinical Dementia Rating Scale* (Clasificación Clínica de la Demencia); **DCL** = deterioro cognitivo leve; **DFT** = demencia frontotemporal; **EA** = enfermedad de Alzheimer; **EAF** = enfermedad de Alzheimer familiar; **ELA** = esclerosis lateral amiotrófica; **IC** = intervalo de confianza; **MMSE** = *Mini-Mental State Examination* (Mini Examen del Estado Mental); **NART** = *National Adult Reading Test* (Test Nacional de Lectura en Adultos); **NfL** = neurofilamento liviano; **PSP** = parálisis supranuclear progresiva; **RMT** = *Recognition Memory Test* (Test de Memoria de Reconocimiento); **Simoa** = matriz de molécula única; **SDC** = suma de casillas; **VIT** = volumen intracraneal total; **WASI** = *Wechsler Abbreviated Scale of Intelligence* (Escala Abreviada de Inteligencia de Wechsler).

Hay gran interés en probar potenciales tratamientos modificadores de enfermedad para la enfermedad de Alzheimer (EA) previo al inicio de los síntomas. Para facilitar esto, se necesitan biomarcadores para identificar individuos en riesgo, estadificar su enfermedad y rastrear la progresión de la enfermedad.<sup>1</sup> Idealmente, dichos biomarcadores deberían ser no invasivos, de bajo costo y simples de adquirir.<sup>2</sup> Los marcadores en sangre tendrían mucho valor, pero son más desafiantes que las mediciones en LCR por varias razones, que incluyen la baja concentración en sangre del analito a testear, haciendo que su cuantificación confiable sea más difícil.<sup>3</sup>

Datos suplementarios en [Neurology.org](http://Neurology.org)

\*Estos autores contribuyeron de igual forma al trabajo.

Del Dementia Research Centre (P.S.J.W., T.P., N.S.R., A.N., Y.L., K.M., I.B.M., R.L.A., H.P., J.K., M.N.R., J.M.S., N.C.F.) y MRC Prion Unit (R.D., S.M.), Department of Neurodegenerative Diseases, UCL Institute of Neurology; Department of Medical Statistics (T.P.), London School of Hygiene & Tropical Medicine, UK; y Clinical Neurochemistry Laboratory, Institute of Neuroscience and Physiology (K.B., H.Z.), the Sahlgrenska Academy at the University of Gothenburg, Mölndal, Sweden.

Ir a [Neurology.org](http://Neurology.org) para declaraciones de intereses completas. La información sobre fondos y aquellas declaraciones relevantes para los autores, si existiesen, se encuentran al final del artículo.

El cargo para procesamiento del artículo fue pagado por el Medical Research Council (UK).

Este es un artículo de acceso libre distribuido bajo los términos de la Creative Commons Attribution License 4.0 (CC BY), que permite su uso sin restricciones, su distribución y reproducción en cualquier medio, siempre que el trabajo original sea correctamente citado.

Un biomarcador de neurodegeneración prometedor es el neurofilamento liviano (NfL), que aumenta en un número de condiciones neurológicas, incluso la EA.<sup>4-8</sup> El NfL puede ser detectado en suero utilizando formatos de inmunoensayo estándar,<sup>9-10</sup> pero muchas de las muestras tienen concentraciones por debajo de la sensibilidad analítica de los métodos.<sup>11</sup> Por lo tanto, usamos un inmunoensayo recientemente desarrollado basado en una matriz de molécula única (Simoa)<sup>12</sup> que es 25 veces más sensible que el método de electroquimioluminiscencia previo para NfL.<sup>11</sup>

Medimos las concentraciones séricas de NfL en la EA familiar (EAF), tanto en portadores de la mutación como en familiares sin la mutación. La EAF comparte muchas características fisiopatológicas y clínicas con la forma más común de enfermedad esporádica.<sup>13</sup> Los portadores de la mutación de la EAF tienen edades de inicio relativamente predecibles,<sup>14</sup> que permiten el estudio prospectivo de individuos previo al inicio de la EA clínica. Nuestra hipótesis fue que con un ensayo más sensible, el NfL sérico elevado sería detectable en los portadores de la mutación de la EAF previo al inicio de los síntomas, y que se correlacionaría con el estadio y la tasa de deterioro de la enfermedad.

**MÉTODOS** **Aprobaciones estándar del protocolo, registros y consentimiento de pacientes.** El estudio fue aprobado por el comité de ética local y todos los participantes dieron su consentimiento informado por escrito.

**Participantes.** Reclutamos 48 participantes de 24 familias con EAF en un estudio, en el *Dementia Research Centre, University College London*, entre abril de 2010 y septiembre de 2015. Los individuos fueron elegibles si tenían un diagnóstico clínico de EAF o tenían un pariente con EAF. Dieciocho pacientes eran sintomáticos, con mutaciones patogénicas en los genes *PSEN1* o *APP*; 30 individuos eran asintomáticos, pero, al tener un pariente afectado, tenían un 50% de riesgo de haber heredado la mutación y, por lo tanto, de desarrollar síntomas a una edad similar a la de su pariente (ver tabla e-1 en [Neurology.org](http://Neurology.org) para ver las mutaciones familiares).

Para todos los participantes, las pruebas genéticas que usan la secuenciación Sanger determinaron la presencia o ausencia de una mutación. Los datos genéticos fueron aportados solo a los estadísticos, asegurando que los participantes y médicos estuvieran ciegos al estado genético; por esta razón, no fue posible aparear a los portadores asintomáticos y a los no portadores. Los años estimados desde el inicio de los síntomas (AEI) fueron calculados para los portadores de la mutación, restándole a su edad la edad en la cual el pariente afectado del participante desarrolló por primera vez síntomas cognitivos progresivos.

Los procedimientos del estudio incluyeron toma de muestras de sangre, un cuestionario de salud semi estructurado (e incluía exclusión de una injuria cerebral reciente), un examen neurológico, una evaluación cognitiva y una RM de cerebro volumétrica, realizándose todas las evaluaciones dentro de los 4 meses de la extracción sanguínea.

El estudio fue aprobado por el *Queen Square Research Ethics Committee* y todos los participantes dieron su consentimiento informado por escrito.

**Evaluación cognitiva.** La evaluación cognitiva incluyó la *Wechsler Abbreviated Scale of Intelligence* (WASI, Escala Abreviada de Inteligencia de Wechsler),<sup>15</sup> el *National Adult Reading Test* (NART, Test Nacional de Lectura en Adultos) (una medida de CI premórbida),<sup>16</sup> el *Recognition Memory Test* (RMT, Test de Memoria de Reconocimiento) para Caras y Palabras,<sup>17</sup> y el *Mini-Mental State Examination* (MMSE, Mini Examen del Estado Mental). Un informante cercano era interrogado de forma separada para obtener una historia colateral. La *Clinical Dementia Rating Scale* (CDR, Clasificación Clínica de la Demencia)<sup>18</sup> aportó un estimado adicional de la severidad clínica; tanto la CDR global como la suma de casillas (SDC) de la CDR fueron calculados. Los individuos eran definidos como sintomáticos si la CDR global era > 0 y el participante o su informante reportaban síntomas consistentes de declinación cognitiva.

**Medición de las concentraciones de NfL sérico.** Las muestras séricas fueron recolectadas, procesadas, separadas y enfriadas a -80 °C de acuerdo con los procedimientos estándar. Medimos el NfL sérico utilizando un inmunoensayo ultrasensible en la plataforma Simoa, utilizando la misma metodología que se describió previamente.<sup>19</sup> Los límites inferiores de detección y cuantificación, definidos por la concentración derivada de la señal de muestras en blanco (diluyente) +3 y 10 DE, fueron 0,97 y 2,93 pg/mL, respectivamente. Para una muestra de control de calidad (CC) con una concentración de 13,0 pg/mL, la repetibilidad fue 14,0% y la precisión intermedia fue 15,7%. Para una muestra de CC con una concentración de 131,8 pg/mL, la repetibilidad fue de 13,3% y la precisión intermedia fue 13,3%. Todas las mediciones fueron realizadas por técnicos de laboratorio certificados en una ronda de experimentos utilizando una sola partida de reactivos.

**Adquisición y análisis de RM.** Se realizó RM en 43 de los 48 participantes al momento de la muestra sanguínea. Cinco participantes no fueron escaneados debido a su negativa o a la imposibilidad de tolerar el procedimiento (por ej., claustrofobia). En 33 de los 43 participantes con un estudio inicial, se realizó un segundo estudio en una visita separada (intervalo promedio  $\pm$  DE = 1.3  $\pm$  0.46 años); los otros 10 individuos no realizaron una segunda imagen porque se retiraron del estudio (n = 5) o por terminarlo antes de la fecha de su segunda imagen (n = 5).

Todas las imágenes fueron realizadas en el mismo equipo 3T Siemens (Munich, Germany) TIM Trio, utilizando una bobina de 32 canales. Se adquirió una RM volumétrica sagital 3D en gradiente de eco T1 (tiempo de eco/tiempo de repetición/tiempo de inversión = 2,9/2200/900 ms, di-

mensiones 256 × 256 × 208, tamaño del voxel 1,1 × 1,1 × 1,1 mm). Las imágenes fueron revisadas visualmente para artefactos. Cuatro imágenes basales y 2 imágenes de seguimiento fueron excluidas debido a movimientos o artefactos metálicos en los dientes, dejando 39 pares de imágenes para las medidas de volumen basal y 30 pares de imágenes para medidas de tasas de atrofia. Se calcularon los volúmenes del cerebro completo, el ventricular y el hipocampal, utilizando métodos semiautomáticos.<sup>20</sup> Para los ventrículos y el hipocampo, se calculó el volumen medio de los hemisferios derecho e izquierdo. Todos los volúmenes fueron corregidos para calcular el volumen intracraneal total (VIT), dividiendo el volumen del participante por el VIT y multiplicándolo por el VIT promedio del grupo. Las tasas anualizadas de los cambios de volumen cerebral, ventricular e hipocampal durante el intervalo inter-imagen fueron calculados utilizando el intervalo de cambio de límite, una medida con base en el registro del cambio de volumen en cada sujeto.<sup>21</sup>

**Análisis estadístico.** El objetivo primario del estudio fue comparar el NfL sérico entre los portadores sintomáticos de la mutación, los portadores presintomáticos y los controles no portadores. Se utilizó un modelo de regresión de mínimos cuadrados generalizado, una extensión del modelo test/análisis de *t* de la varianza que permite diferentes varianzas residuales específicas de grupo, para comparar el NfL entre los grupos, ajustándolos para edad y sexo. La familia fue incluida como un efecto aleatorio para evaluar cualquier efecto de agrupamiento intrafamiliar.

Los coeficientes de correlación de Spearman fueron calculados para evaluar la asociación entre el NfL y los

AEI, primero a través de todos los portadores de mutación y después en portadores presintomáticos solamente y en portadores sintomáticos solamente. Este enfoque con base en rangos, que puede ser utilizado con variables unidas y es robusto para la no-normalidad y los valores erráticos, también fue utilizado para las medidas de NfL y cognitivas, que incluyen el cambio estimado en el CI (WASI CI menos NART-CI premórbido predicho), la memoria de reconocimiento (un promedio de puntajes desde RMT de caras y RMT de palabras), MMSE y SDC de la CDR. También evaluamos asociaciones entre las medidas de NfL y RM. Para cada asociación, calculamos el coeficiente de Spearman utilizando primero todos los puntos de datos disponibles, y después utilizando solo los datos de individuos que completaron todas las evaluaciones.

Calculamos los coeficientes de correlación de Spearman entre los AEI y cada medida cognitiva y de imagen, incluyendo solo a los participantes presintomáticos. Para lograr que los resultados sean comparables, estos análisis fueron realizados utilizando solo individuos con todos los puntos de datos disponibles. Para todos los análisis, los valores faltantes eran tomados como completamente ausentes en la aleatorización. El umbral para el significado estadístico se estableció en  $p < 0,05$  (2 colas) y no se realizó ajuste para las pruebas múltiples.

**RESULTADOS** Los detalles demográficos, puntajes cognitivos, medidas de imagen y los valores de NfL sérico de los participantes se muestran en la tabla 1 y figura 1. De los participantes asintomáticos, 19 eran portadores de mutación y 11 eran no portadores; los no portadores fue-

**Tabla 1** Características demográficas, puntajes de pruebas cognitivas, mediciones de imagen y concentración sérica de neurofilamento (NfL) de los participantes

|                                                           | No portadores             | Portadores presintomáticos | Portadores sintomáticos   |
|-----------------------------------------------------------|---------------------------|----------------------------|---------------------------|
| <b>n</b>                                                  | 11                        | 19                         | 18                        |
| <b>Edad, años, media (DE)</b>                             | 38.9 (9.5)                | 36.0 (5.7)                 | 46.6 (9.3)                |
| <b>Sexo, M/F</b>                                          | 3/8                       | 10/9                       | 13/5                      |
| <b>AEI, años</b>                                          | -                         | -9.6 (5.5)                 | +3.4 (3.3)                |
| <b>MMSE/30</b>                                            | 30,0 (30,0-30,0)          | 29,0 (29,0-30,0)           | 20,0 (19,0-27,0) (n = 17) |
| <b>CDR global</b>                                         | 0 (0-0)                   | 0 (0-0)                    | 0,5 (0,5-1,0) (n = 16)    |
| <b>CDR SDC</b>                                            | 0 (0-0)                   | 0 (0-0)                    | 3,75 (2-4,75) (n = 16)    |
| <b>NART CI predicho</b>                                   | 101,0 (7,1) (n = 10)      | 97,3 (11,9)                | 98,8 (13,9) (n = 13)      |
| <b>WASI CI</b>                                            | 110,1 (10,2) (n = 10)     | 98,7 (10,4)                | 85,7 (20,0) (n = 13)      |
| <b>Cambio estimado en CI</b>                              | 9,1 (8,0) (n = 10)        | 1,4 (2)                    | -13,2 (14,2) (n = 13)     |
| <b>RMT promedio combinado/50</b>                          | 46,5 (45,5-47,5) (n = 10) | 44,5 (41,5-47,0)           | 38,0 (32,0-41,0) (n = 13) |
| <b>Volumen cerebral basal (corregido para VIT), mL</b>    | 1230 (56) (n = 9)         | 1220 (67) (n = 17)         | 1110 (59) (n = 13)        |
| <b>Tasa de atrofia de todo el cerebro, %/año</b>          | 0,1 (0,4) (n = 8)         | 0,1 (0,7) (n = 13)         | 1,3 (1,6) (n = 9)         |
| <b>Volumen ventricular basal (corregido para VIT), mL</b> | 10,5 (5) (n = 9)          | 13,2 (7,5) (n = 17)        | 24,3 (9,2) (n = 12)       |
| <b>Tasa de cambio en el volumen ventricular, %/año</b>    | 0,6 (6,5) (n = 8)         | 1,3 (5,6) (n = 13)         | 16,4 (10,5) (n = 9)       |
| <b>Volumen hipocampal basal (corregido para VIT), mL</b>  | 2,8 (0,3) (n = 8)         | 3,0 (0,2) (n = 17)         | 2,5 (0,3) (n = 12)        |
| <b>Tasa de atrofia hipocampal, %/año</b>                  | 0,1 (1,0) (n = 8)         | 0,6 (1,5) (n = 13)         | 3,9 (2,5) (n = 8)         |
| <b>NfL sérico, pg/mL</b>                                  | 12,7 (7,2)                | 16,7 (7,7)                 | 46,0 (20,8)               |

Abreviaturas: AEI = años estimados al inicio de los síntomas; CDR = Clasificación Clínica de la Demencia; MMSE = Mini Examen del Estado Mental; NART = Test Nacional de Lectura en Adultos; RMT = Test de Memoria de Reconocimiento; SDB = suma de boxes; VIT = volumen intracraneal total; WASI = Escala Abreviada de Inteligencia de Wechsler. El cambio estimado de CI fue calculado restando el CI actual (medido por el WASI) del CI predicho premórbido (medido por el NART). Todos los valores son medias de grupo (con DE), excepto las variables acotadas (MMSE, CDR global, CDR SDB y RMT combinado), que se muestran como mediana (rango intercuartil). Las medidas no están corregidas para ninguna covariable. Para variables con puntos de datos faltantes, el número de observaciones se aclara luego del valor promedio del grupo (por ej., n = x).

**Figura 1** Diagrama de caja y puntos para el neurofilamento liviano (NfL) sérico en los 3 grupos

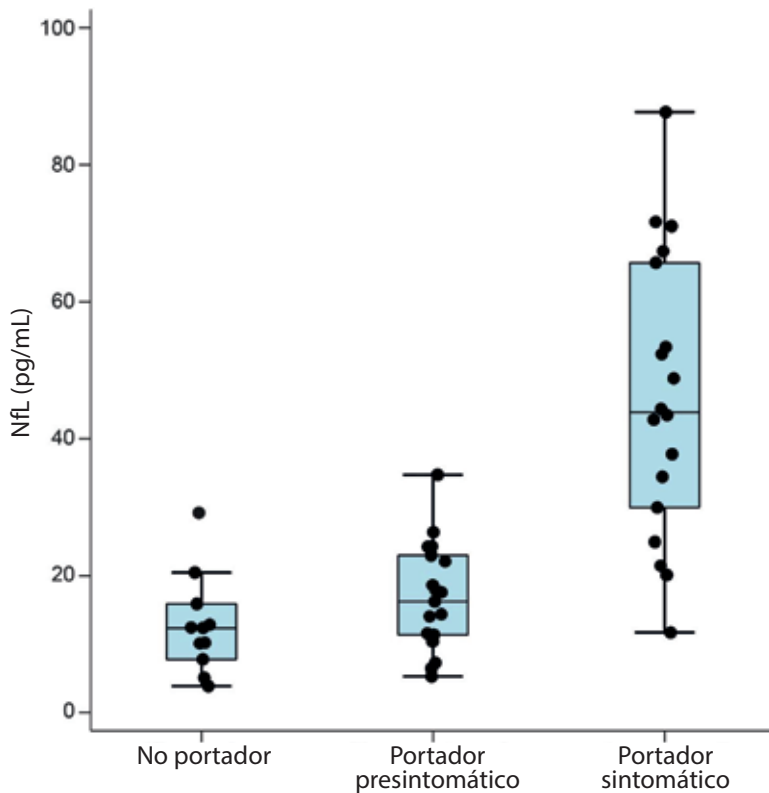

Se muestran las concentraciones séricas de NfL medidas no ajustadas. Los portadores de mutación han sido divididos en sintomáticos y presintomáticos.

ron utilizados como controles sanos. La media de AEI de los portadores presintomáticos de la mutación fue -9.6 años. Ajustándola para edad y sexo, la concentración sérica de NfL fue significativamente mayor en los portadores sintomáticos que en los portadores presintomáticos (diferencia estimada en media 23,2 pg/mL, intervalo de confianza [IC] del 95% 13,1-33,2;  $p < 0,0001$ ) y en los no portadores (29,2 pg/mL, 19,3-39,1;  $p < 0,0001$ ). Los portadores de mutación presintomáticos tuvieron concentraciones de NfL significativamente mayores que los no portadores (6,1 pg/mL, 1,6-10,5;  $p = 0,007$ ). Permitir el agrupamiento intrafamiliar no tuvo efecto en los resultados.

En todos los portadores de mutación hubo evidencia de una asociación entre las concentraciones séricas de NfL y AEI (Spearman  $\rho = 0,81$ ,  $p < 0,0001$ ), con aquellos individuos en un estadio más tardío de la enfermedad con concentraciones mayores de NfL (figura 2). Más aún, esta asociación estuvo significativamente separada tanto para los grupos presintomático ( $\rho = 0,55$ ,  $p = 0,01$ ) y sintomático ( $\rho = 0,49$ ,  $p = 0,04$ ). Un análisis de regresión lineal *post hoc* en los portadores de mutación no encontró una asociación estadísticamente significativa entre el NfL y la edad, luego de ajustarlo para AEI (por ej., estadio de la enfermedad) ( $p = 0,15$ ).

La figura 3 muestra gráficos de puntos y coeficientes de Spearman para NfL sérico contra las medidas cognitivas y de imagen para todos los portadores de mutación, con una distribución de la concentración de NfL relativamente uniforme a través del espectro de severidad de la enfermedad. Hubo correlaciones estadísticamente significativas entre el NfL sérico y las medidas cognitivas, que incluyen el MMSE, SDC de la CDR y cambio estimado en CI, con una evidencia menor para una correlación con el puntaje de memoria de reconocimiento. En portadores de mutación, hubo una correlación significativa entre el NfL y las medidas de imagen de corte transversal, el volumen ventricular basal y el volumen hipocampal basal. También hubo una correlación significativa entre el NfL sérico y la subsecuente tasa de cambio, tanto en el volumen cerebral como en el volumen ventricular, pero no en el volumen hipocampal. Al repetir el análisis, incluyendo datos solo de los 19 individuos que completaron todas las evaluaciones, no se vio un cambio material en los resultados, salvo para el NfL y el RMT combinado (el valor de  $p$  cambió de 0,06 a 0,6).

Para los portadores presintomáticos solamente, hubo una evidencia débil para una correlación entre el NfL y el volumen ventricular basal ( $\rho = 0,43$ ,  $p = 0,08$ ) y entre el NfL y el SDC de la CDR ( $\rho = 0,40$ ,  $p = 0,08$ ), pero no hubo evidencia de correlación con ninguna otra medida de imagen o cognitiva.

Al incluir solo a los 13 individuos presintomáticos con imágenes seriadas, seguía habiendo una correlación significativa entre el NfL sérico y los AEI (tabla 2). Sin embargo, al evaluar las correlaciones entre cada una de las 6 medidas de imagen y AEI en los mismos individuos, ninguna fue estadísticamente significativa.

**DISCUSIÓN** Utilizando un inmunoensayo ultrasensible, encontramos que las concentraciones séricas de NfL están aumentadas en un grupo de portadores de la mutación de EAF sintomáticos, que en promedio están levemente afectados clínicamente (mediana de CDR global 0,5); también encontramos un aumento en las concentraciones de NfL en portadores presintomáticos de la mutación, que en promedio estaban a 9 años del inicio predicho de sus síntomas. El NfL sérico se correlacionó de forma significativa con los años estimados a/desde el inicio de los síntomas (AEI) en todos los portadores de mutación, como también en los grupos sintomático y presintomático por separado.

En todos los portadores el NfL sérico se correlacionó con la SDC de la CDR y varias medidas cognitivas. También hubo una correlación entre el NfL sérico y las medidas en RM de neurodegeneración asociada a EA, ambos en términos

**Figura 2** Diagrama de puntos del neurofilamento liviano (NfL) sérico contra los años estimados al inicio de los síntomas (AEI)

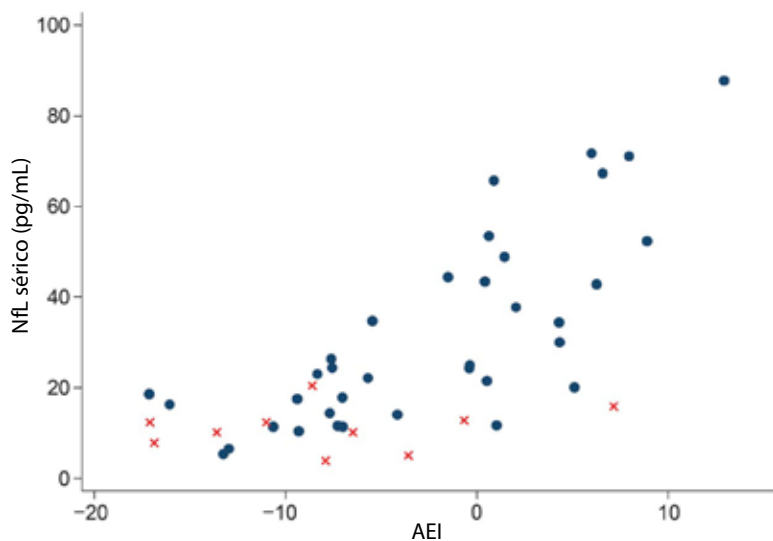

Los portadores de mutación son representados por puntos y los no portadores, por cruces. Para asegurarnos que no sea posible identificar a ninguno de los participantes asintomáticos individuales (sobre la base de su AEI) y determinar así el estado de la mutación, 2 participantes aislados han sido removidos y se aplicó un lapso de hasta  $\pm 2$  años para todos los participantes restantes.

de pérdida de volumen de corte transversal y las subsecuentes tasas de atrofia. Esto sugiere que las concentraciones séricas pueden relacionarse con la severidad de la enfermedad o la tasa de progresión.

Nuestras concentraciones séricas de NfL para EAF sintomática son similares a las de un estudio reciente de EA esporádica que utilizó el mismo inmunoensayo ultrasensible.<sup>22</sup> La concentración media para nuestro grupo sintomático (46,0 pg/mL) (que contiene una mezcla de deterioro cognitivo leve [DCL] y EA) está entre sus valores medios para el DCL (42,8 pg/mL) y la demencia por EA (51,0 pg/mL) esporádicos. Sin embargo, acá extendemos los hallazgos previos mostrando que los aumentos medibles en el NfL sérico preceden al inicio de la enfermedad sintomática y se correlacionan con el tiempo predicho hasta el inicio de los síntomas. El aumento progresivo presintomático observado es consistente con los modelos propuestos de neurodegeneración presintomática en EA.<sup>23</sup> El NfL forma una parte importante de la integridad axonal estructural, con su ascenso que refleja probablemente un daño axonal temprano.<sup>24</sup>

Nuestro hallazgo de un aumento presintomático en el NfL sérico en los portadores de la mutación de EAF contrasta con los hallazgos de la esclerosis lateral amiotrófica (ELA) familiar, donde no se detectó ningún aumento hasta después del inicio de los síntomas, a pesar de que los participantes sintomáticos con ELA tenían niveles mucho mayores que los detectados en cualquier EA familiar o esporádica.<sup>25</sup> Esto probablemente

refleja diferencias en la biología subyacente y el patrón temporal de neurodegeneración en EA vs ELA. La ELA es un proceso neurodegenerativo más agresivo en el estadio sintomático, pero sin la fase larga, gradualmente progresiva presintomática característica de la EA. Es importante decir que las tasas de atrofia están aumentadas en los 5 años previos a los síntomas en la EAF y el depósito amiloide aparece incluso antes.<sup>26-28</sup>

La correlación del NfL sérico con las medidas cognitivas sensibles a la declinación por EA apoya la relevancia clínica del NfL. Mientras que los cambios cognitivos tempranos en la EAF involucran más comúnmente a la memoria episódica,<sup>29</sup> nosotros encontramos que el NfL sérico se correlaciona más fuertemente con las medidas cognitivas globales que con los puntajes de memoria. Esto puede relacionarse con el rol fisiológico del NfL en el cerebro como un componente esencial de la estabilidad axonal, con un aumento inicial que posiblemente refleja una ruptura extendida sutil de redes neuronales y no tanto una atrofia focal hipocámpica (sustancia gris). La posibilidad de que la elevación de los niveles séricos de NfL refleja más estrechamente la neurodegeneración global está también apoyada por su correlación, en todos los portadores, con la pérdida de volumen global del cerebro y ventricular. Esto contrasta con hallazgos en otras enfermedades neurodegenerativas, que incluyen la parálisis supranuclear progresiva (PSP) y la demencia frontotemporal (DFT), donde la atrofia focal específica de la enfermedad parece estar más fuertemente asociada con el NfL que con la atrofia cerebral global.<sup>19,30</sup>

Es notable que, mientras el NfL sérico se correlaciona en forma significativa con el estadio de enfermedad (por ej., AEI), incluso cuando se incluye solo a los participantes presintomáticos, las medidas de imagen y cognitivas no. El NfL sérico puede ser, por lo tanto, un marcador más sensible de neurodegeneración temprana.

Al ser medido en el LCR de individuos con DCL, el NfL fue predictivo de posterior progresión a demencia por EA,<sup>4</sup> con un meta-análisis reciente que muestra que tiene un poder similar a biomarcadores bien establecidos de EA en LCR, como  $A\beta_{1-42}$ , tau total y tau fosforilada.<sup>3</sup> Estudios recientes que compararon la medición de NfL sérico y en LCR mostraron una estrecha correlación,<sup>9,10,22</sup> lo que implica que el NfL sérico puede predecir de forma similar la progresión posterior, en concordancia con nuestros resultados.

Un estudio de un modelo de ratón con EAF, donde anularon el gen NfL, mostró que la deficiencia de NfL aumenta significativamente la neurodegeneración relacionada a EA, un hallazgo que podría sugerir un rol para el NfL en el mantenimiento de la estructura neuronal en pacientes con EA.<sup>31</sup> Más aún, en los ratones APP/PS1, el

**Figura 3** Diagrama de puntos del neurofilamento liviano (NfL) sérico contra las medidas cognitivas y de imagen en todos los portadores de mutación

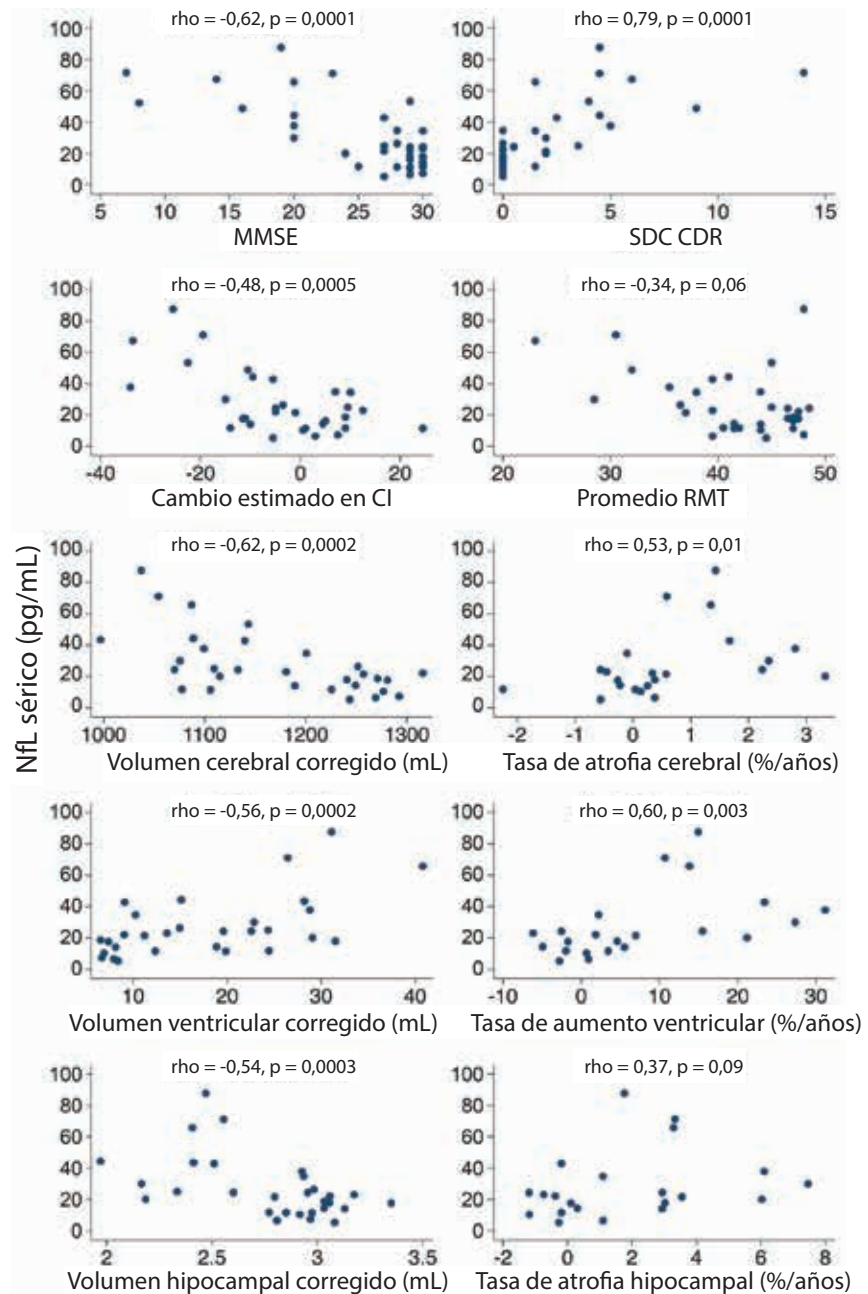

Se muestran el Spearman  $\rho$  y el valor  $p$  asociado para cada gráfico. El cambio estimado en CI fue calculado sustrayendo el CI actual (medido con la Escala Abreviada de Inteligencia de Wechsler) del CI predicho premórbido (medido con el Test Nacional de Lectura de Adultos). SDC CDR = suma de casillas de la Clasificación Clínica de Demencia; MMSE = Mini Examen del Estado Mental; RMT = Test de Memoria de Reconocimiento.

examen histopatológico encontró anomalías neuríticas NfL-positivas, consistentes con el NfL aumentado en la EA, lo que indica daño axonal subyacente.<sup>10</sup> El mismo estudio mostró que las concentraciones séricas de NfL aumentan de forma temprana en la enfermedad y estuvieron estrechamente asociadas con la progresión de la patología tipo EA. Las concentraciones séricas de NfL disminuyeron en respuesta a la inmunoterapia anti-A $\beta$  y los autores sugirieron que el NfL

sérico puede servir como un biomarcador de la respuesta al tratamiento.

Hay beneficios obvios de identificar biomarcadores en sangre de la EA,<sup>2</sup> con numerosos candidatos propuestos.<sup>32</sup> Sin embargo, un meta-análisis reciente muy completo de marcadores sanguíneos mostró que solo la tau total diferenciaba de forma confiable la EA de los controles sanos.<sup>3,33</sup> Más aún, la tau en sangre solamente probó ser útil en identificar la EA con

**Tabla 2** Correlaciones presintomáticas entre los biomarcadores y los años estimados desde el inicio de los síntomas (AEI)

| Correlación entre AEI y:                           | Spearman $\rho$ | Valor $p$ |
|----------------------------------------------------|-----------------|-----------|
| NfL sérico                                         | 0,73            | 0,005     |
| MMSE                                               | 0,09            | 0,8       |
| SDC CDR                                            | 0,51            | 0,07      |
| Cambio estimado en CI                              | -0,23           | 0,5       |
| RMT promedio                                       | 0,52            | 0,07      |
| Volumen cerebral basal (corregido para VIT), mL    | -0,43           | 0,1       |
| Tasa de atrofia de todo el cerebro, %/año          | 0,09            | 0,8       |
| Volumen ventricular basal (corregido para VIT), mL | 0,36            | 0,2       |
| Tasa de cambio en el volumen ventricular, %/año    | 0,52            | 0,07      |
| Volumen hipocampal basal (corregido para VIT), mL  | -0,07           | 0,8       |
| Tasa de atrofia hipocampal, %/año                  | 0,18            | 0,6       |

Abreviaturas: MMSE = Mini Examen del Estado Mental; NfL = neurofilamento liviano; RMT = Test de Memoria de Reconocimiento; SDC CDR = suma de casillas de la Clasificación Clínica de la Demencia; VIT = volumen intracraneal total.

El cambio estimado en CI fue calculado sustrayendo el CI actual (medido con la Escala Abreviada de Inteligencia de Wechsler) del CI predicho premórbido (medido con el Test Nacional de Lectura de Adultos). Los coeficientes de correlación Spearman para NfL sérico, puntajes de test cognitivos y medidas de imagen contra AEI, en participantes presintomáticos solamente. Para permitir comparaciones directas entre las diferentes medidas, solo los 13 portadores presintomáticos para quienes estaban disponibles el NfL sérico y las imágenes seriadas fueron incluidos.

demencia establecida, sin evidencia de que sea útil en la enfermedad temprana, y frecuentemente hay solapamiento entre los grupos de pacientes y controles.<sup>3,32</sup> Los estudios que intentaron medir las concentraciones en sangre de  $A\beta_{1-42}$ , el otro marcador molecular clave de la patología de la EA, hasta ahora dieron resultados conflictivos, sin evidencia global fuerte de una diferencia entre la EA y los controles.<sup>3,32</sup> Más aún, incluso si las fracciones del  $\beta$ -amiloide pudiesen ser identificadas y cuantificadas de forma confiable, como se piensa que la deposición cerebral de  $A\beta$  llega a una meseta en algún momento antes del inicio de los síntomas,<sup>28</sup> puede no llegar a rastrear la progresión, salvo en etapas muy tempranas de la enfermedad. Por otro lado, un marcador de la cascada de neurodegeneración, como el NfL, que puede reflejar la actividad global activa de la enfermedad, podría ser útil como medida de resultado para un ensayo, desde la fase presintomática a la sintomática. Una prueba sanguínea de neurodegeneración podría también ser útil clínicamente para identificar qué individuos con preocupaciones cognitivas deben priorizarse para una investigación más detallada.

Un número de estudios investigaron perfiles en plasma o suero en un intento de identificar una característica patológica de la EA, utilizando enfoques de perfiles que incluyen proteómicos, lipidómicos y transcriptómicos.<sup>34-36</sup> Sin embargo, la pobre reproducibilidad continúa siendo un problema cuando se evalúan grandes paneles de moléculas involucradas en potenciales vías biológicas diversas, con varios estudios de seguimiento que muestran resultados negativos.<sup>37-39</sup> Aunque nuestros hallazgos encuentran apoyo en estudios previos de NfL sérico en EA sintomáti-

ca,<sup>9,10,22</sup> sería importante (1) replicar los hallazgos presintomáticos, hasta ahora solo mostrados en ratones,<sup>10</sup> en otras EAF en riesgo y en cohortes de EA esporádica (por ej., en controles ancianos positivos para amiloide); y (2) determinar los resultados clínicos en estos individuos para evaluar el valor predictivo y la evolución temporal de los aumentos en el NfL sérico.

Aunque nuestros resultados son esperanzadores, hay una cantidad de problemas en cuanto a la utilidad del NfL como biomarcador de la EA temprana. Mientras que como grupo los portadores presintomáticos tienen una media mayor de NfL que los no portadores, hubo cierto grado de solapamiento en los valores observados. La utilidad del NfL sérico para diagnosticar EA presintomática a nivel individual sigue siendo por lo tanto incierta, y necesita reevaluaciones en cohortes independientes. Los cambios en el NfL sérico a lo largo de la enfermedad fueron analizados en datos de corte transversal solamente, por lo que no se sabe si el NfL sérico rastrea la progresión a nivel individual. También, aunque nuestros hallazgos apoyan el uso del NfL sérico como marcador de neurodegeneración en EA, el NfL no es un marcador específico de la EA y mostró estar aumentado en otras condiciones, incluso la demencia asociada al VIH, la PSP, la DFT y la ELA.<sup>19,25,30,40</sup> Puede ser, por lo tanto, que el NfL sérico sea más útil para identificar y rastrear neurodegeneración relacionada a la EA con un test que confirme la patología molecular de la EA, por ej. Tau/ $A\beta_{1-42}$  en LCR o PET amiloide.

Nuestro estudio tiene limitaciones. El tamaño de la muestra no fue grande, principalmente por la relativa rareza de las mutaciones de EAF. Sin embargo, este sigue siendo una de las cohortes de EAF de centro único más grandes reportadas hasta ahora. Para un número de participantes, no todas las evaluaciones cognitivas y de imagen fueron completadas. Sin embargo, se vieron cambios mínimos cuando se volvieron a realizar los análisis para incluir solo aquellos participantes que habían completado todas las evaluaciones. Estimamos la edad a la cual cada portador de mutación debería desarrollar síntomas sobre la base de la edad parental de inicio, que está estrechamente asociada con la verdadera edad de inicio;<sup>14</sup> sin embargo, esto sigue siendo una medida aproximada y la edad de inicio solo puede ser confirmada con el seguimiento longitudinal.

Utilizando un ensayo ultrasensible, mostramos que la concentración de NfL sérico está aumentada en la EAF previo a la enfermedad sintomática, y se correlaciona con el número de años hasta/desde el inicio de síntomas predicho. El NfL sérico también se correlacionó con marcadores cognitivos y de neuroimagen de severidad de la enfermedad. Nuestros hallazgos sugieren que se necesita más investigación del NfL sérico

como un biomarcador fácilmente accesible de la neurodegeneración relacionada con la EA temprana.

### CONTRIBUCIONES DE LOS AUTORES

P. Weston contribuyó con la conceptualización y diseño del estudio, la recolección, análisis e interpretación de datos y el borrador/revisión del manuscrito. T. Poole condujo el análisis estadístico y la interpretación de los datos y ayudó en el borrador/revisión del manuscrito. N. Ryan contribuyó con la recolección de datos y con el borrador/revisión del manuscrito. A. Nair contribuyó con la interpretación de los datos y el borrador/revisión del manuscrito. Y. Liang contribuyó con la recolección de datos y el borrador/revisión del manuscrito. K. Macpherson contribuyó con la recolección de datos y el borrador/revisión del manuscrito. R. Drueh contribuyó con el análisis de muestras séricas y el borrador/revisión del manuscrito. I. Malone contribuyó con el análisis de imágenes y el borrador/revisión del manuscrito. L. Ahsan contribuyó con el análisis de imágenes y el borrador/revisión del manuscrito. H. Pemberton contribuyó con el análisis de imágenes y el borrador/revisión del manuscrito. J. Klimova contribuyó con el análisis de imágenes y el borrador/revisión del manuscrito. S. Mead contribuyó con el análisis de muestras séricas, interpretación de datos y el borrador/revisión del manuscrito. K. Blennow contribuyó con el análisis de muestras séricas, interpretación de datos y el borrador/revisión del manuscrito. M. Rossor contribuyó con la interpretación de datos y el borrador/revisión del manuscrito. J. Schott contribuyó con la interpretación de datos y el borrador/revisión del manuscrito. H. Zetterberg contribuyó con la conceptualización y diseño del estudio, el análisis de muestras séricas, la interpretación de resultados y el borrador/revisión del manuscrito. N. Fox contribuyó con la conceptualización y diseño del estudio, la interpretación de resultados y el borrador/revisión del manuscrito.

### RECONOCIMIENTOS

Los autores agradecen a los participantes y a sus familias por su participación, y al profesor Chris Frost por su consejo en cuanto al análisis estadístico.

### FONDOS PARA EL ESTUDIO

P.S.J.W. es apoyado por una beca de entrenamiento del MRC Clinical Research. N.S.R. es apoyado por una beca de Brain Exit. A.N. es apoyado por una beca de Wolfson Foundation. S.M. reconoce apoyo de MRC y el NIHR Queen Square Dementia Biomedical Research Unit (BRU). K.B. recibe apoyo del Torsten Söderberg Foundation en la Swedish Royal Academy of Sciences, el Research Council Sweden, el Brain Foundation Sweden y el Alzheimer Foundation Sweden. M.N.R. y N.C.F. son investigadores seniors del NIHR. El Dementia Research Centre es un centro de coordinación ARUK y agradece por el apoyo del NIHR Queen Square Dementia BRU, la MRC Dementias Platform UK y el Leonard Wolfson Experimental Neurology Centre. El estudio se realizó en UCLH/UCL, que recibió una proporción de fondos del Department of Health's NIHR Biomedical Research Centres. H.Z. es becario del Wallenberg Academy y recibe apoyo del European Research Council, el Swedish Research Council, Frimurarestiftelsen y VINNOVA.

### DECLARACIÓN DE INTERESES

P. Weston, T. Poole, N. Ryan, A. Nair, Y. Liang, K. Macpherson, R. Drueh, I. Malone, L. Ahsan, H. Pemberton, J. Klimova y S. Mead no tienen nada para declarar relevante al manuscrito. K. Blennow sirvió como consultor en los comités de consejos para Alzheon, Eli Lilly, Fujirebio Europe, IBL International, Novartis y Roche Diagnostics, y es cofundador de Brain Biomarker Solutions in Gothenburg AB, a GU Venture based platform company en la University of Gothenburg. M. Rossor no tiene nada para declarar relevante al manuscrito. J. Schott ha recibido apoyo para investigación de AVID Radiopharmaceuticals (subsidiaria de Eli Lilly), fue consultor para Roche Pharmaceuticals y Eli Lilly, y sirve en el Data Safety Monitoring Committee for Axon Neuroscience SE. H. Zetterberg es cofundador de Brain Biomarker Solutions in Gothenburg AB, a GU Venture-based platform company en la University of Gothenburg, y ha dado apoyo científico para Roche Diagnostics, Eli Lilly y Pharnasum Therapeutics. N. Fox reporta fondos pagados al University College London por ser consultor para Janssen, Eli Lilly, Novartis, Sanofi, Roche/Genentech y GlaxoSmithKline y servir en el comité de monitoreo de datos para Biogen. Ir a [Neurology.org](http://Neurology.org) para declaraciones completas.

Recibido el 14 de abril de 2017. Aceptado en su formato final el 21 de agosto de 2017.

### BIBLIOGRAFÍA

1. Sperling RA, Aisen PS, Beckett LA, et al. Toward defining the preclinical stages of Alzheimer's disease: recommendations from the National Institute on Aging-Alzheimer's Association workgroups on diagnostic guidelines for Alzheimer's disease. *Alzheimers Dement* 2011;7:280–292.
2. The Ronald and Nancy Reagan Research Institute of the Alzheimer's Association and the National Institute on Aging Working Group. Consensus Report of the Working Group on Molecular and Biochemical Markers of Alzheimer's Disease. *Neurobiol Aging* 1998;19:109–116.
3. Olsson B, Lautner R, Andreasson U, et al. CSF and blood biomarkers for the diagnosis of Alzheimer's disease: a systematic review and meta-analysis. *Lancet Neurol* 2016;15:673–684.
4. Zetterberg H, Skillback T, Mattsson N, et al. Association of cerebrospinal fluid neurofilament light concentration with Alzheimer disease progression. *JAMA Neurol* 2016;73:60–67.
5. Teunissen CE, Dijkstra C, Polman C. Biological markers in CSF and blood for axonal degeneration in multiplesclerosis. *Lancet Neurol* 2005;4:32–41.
6. Scherling CS, Hall T, Berisha F, et al. Cerebrospinal fluid neurofilament concentration reflects disease severity in frontotemporal degeneration. *Ann Neurol* 2014;75:116–126.
7. Tortelli R, Ruggieri M, Cortese R, et al. Elevated cerebrospinal fluid neurofilament light levels in patients with amyotrophic lateral sclerosis: a possible marker of disease severity and progression. *Eur J Neurol* 2012;19:1561–1567.
8. Alves S, Churlaud G, Audrain M, et al. Interleukin-2 improves amyloid pathology, synaptic failure and memory in Alzheimer's disease mice. *Brain* 2016;140:826–842.
9. Gaiottino J, Norgren N, Dobson R, et al. Increased neurofilament light chain blood levels in neurodegenerative neurological diseases. *PLoS One* 2013;8:e75091.



10. Bacioglu M, Maia LF, Preische O, et al. Neurofilament light chain in blood and CSF as marker of disease progression in mouse models and in neurodegenerative diseases. *Neuron* 2016;91:56–66.
11. Kuhle J, Barro C, Andreasson U, et al. Comparison of three analytical platforms for quantification of the neurofilament light chain in blood samples: ELISA, electrochemiluminescence immunoassay and Simoa. *Clin Chem Lab Med* 2016;54:1655–1661.
12. Rissin DM, Kan CW, Campbell TG, et al. Single-molecule enzyme-linked immunosorbent assay detects serum proteins at subfemtomolar concentrations. *Nat Biotechnol* 2010;28:595–599.
13. Bateman RJ, Aisen PS, De Strooper B, et al. Autosomal-dominant Alzheimer's disease: a review and proposal for the prevention of Alzheimer's disease. *Alzheimers Res Ther* 2011;3:1.
14. Ryman DC, Acosta-Baena N, Aisen PS, et al. Symptom onset in autosomal dominant Alzheimer disease: a systematic review and meta-analysis. *Neurology* 2014;83:253–260.
15. Wechsler D. Wechsler Abbreviated Scale of Intelligence (WASI). San Antonio: Psychological Corporation; 1999.
16. Nelson HE, Wilson JR. National Adult Reading Test (NART), 2nd ed. Windsor: NFER-Nelson; 1991.
17. Warrington EK. Recognition Memory Test. Windsor: NFER-Nelson; 1984.
18. Morris JC. The Clinical Dementia Rating (CDR): current version and scoring rules. *Neurology* 1993;43:2412–2414.
19. Rohrer JD, Woollacott IO, Dick KM, et al. Serum neurofilament light chain protein is a measure of disease intensity in frontotemporal dementia. *Neurology* 2016;87:1329–1336.
20. Freeborough PA, Fox NC, Kitney RI. Interactive algorithms for the segmentation and quantitation of 3-D MRI brain scans. *Comput Methods Programs Biomed* 1997;53:15–25.
21. Freeborough PA, Fox NC. The boundary shift integral: an accurate and robust measure of cerebral volume changes from registered repeat MRI. *IEEE Trans Med Imaging* 1997;16:623–629.
22. Mattsson N, Andreasson U, Zetterberg H, Blennow K, Alzheimer's Disease Neuroimaging Initiative. Association of plasma neurofilament light with neurodegeneration in patients with Alzheimer disease. *JAMA Neurol* 2017;74:557–566.
23. Jack CR Jr, Knopman DS, Jagust WJ, et al. Hypothetical model of dynamic biomarkers of the Alzheimer's pathological cascade. *Lancet Neurol* 2010;9:119–128.
24. Sjogren M, Blomberg M, Jonsson M, et al. Neurofilament protein in cerebrospinal fluid: a marker of white matter changes. *J Neurosci Res* 2001;66:510–516.
25. Weydt P, Oeckl P, Huss A, et al. Neurofilament levels as biomarkers in asymptomatic and symptomatic familial amyotrophic lateral sclerosis. *Ann Neurol* 2016;79:152–158.
26. Ridha BH, Barnes J, Bartlett JW, et al. Tracking atrophy progression in familial Alzheimer's disease: a serial MRI study. *Lancet Neurol* 2006;5:828–834.
27. Weston PS, Nicholas JM, Lehmann M, et al. Presymptomatic cortical thinning in familial Alzheimer disease: a longitudinal MRI study. *Neurology* 2016;87:2050–2057.
28. Villemagne VL, Burnham S, Bourgeat P, et al. Amyloid  $\beta$  deposition, neurodegeneration, and cognitive decline in sporadic Alzheimer's disease: a prospective cohort study. *Lancet Neurol* 2013;12:357–367.
29. Fox NC, Warrington EK, Seiffer AL, Agnew SK, Rossor MN. Presymptomatic cognitive deficits in individuals at risk of familial Alzheimer's disease. A longitudinal prospective study. *Brain* 1998;121:1631–1639.
30. Rojas JC, Karydas A, Bang J, et al. Plasma neurofilament light chain predicts progression in progressive supranuclear palsy. *Ann Clin Transl Neurol* 2016;3:216–225.
31. Fernandez-Martos CM, King AE, Atkinson RA, Woodhouse A, Vickers JC. Neurofilament light gene deletion exacerbates amyloid, dystrophic neurite, and synaptic pathology in the APP/PS1 transgenic model of Alzheimer's disease. *Neurobiol Aging* 2015;36:2757–2767.
32. Lista S, O'Bryant SE, Blennow K, et al. Biomarkers in sporadic and familial Alzheimer's disease. *J Alzheimers Dis* 2015;47:291–317.
33. Zetterberg H, Wilson D, Andreasson U, et al. Plasma tau levels in Alzheimer's disease. *Alzheimers Res Ther* 2013;5:9.
34. Ray S, Britschgi M, Herbert C, et al. Classification and prediction of clinical Alzheimer's diagnosis based on plasma signaling proteins. *Nat Med* 2007;13:1359–1362.
35. Han X, Rozen S, Boyle SH, et al. Metabolomics in early Alzheimer's disease: identification of altered plasma sphingolipidome using shotgun lipidomics. *PLoS One* 2011;6:e21643.
36. Booij BB, Lindahl T, Wetterberg P, et al. A gene expression pattern in blood for the early detection of Alzheimer's disease. *J Alzheimers Dis* 2011;23:109–119.
37. Soares HD, Chen Y, Sabbagh M, Roher A, Schrijvers E, Breteler M. Identifying early markers of Alzheimer's disease using quantitative multiplex proteomic immunoassay panels. *Ann NY Acad Sci* 2009;1180:56–67.
38. Mielke MM, Haughey NJ, Bandaru VV, et al. Plasma sphingomyelins are associated with cognitive progression in Alzheimer's disease. *J Alzheimers Dis* 2011;27:259–269.
39. Casanova R, Varma S, Simpson B, et al. Blood metabolite markers of preclinical Alzheimer's disease in two longitudinally followed cohorts of older individuals. *Alzheimers Dement* 2016;12:815–822.
40. Gisslen M, Price RW, Andreasson U, et al. Plasma concentration of the neurofilament light protein (NFL) is a biomarker of CNS injury in HIV infection: a crosssectional study. *EBioMedicine* 2016;3:135–140.
